# Supplementary material for: Neutralising capacity against Delta (B.1.617.2) and other variants of concern following Comirnaty (BNT162b2, BioNTech/Pfizer) vaccination in health care workers, Israel
Source: PubMed Central journal article supplement (PMC8326656; doi:10.2807/1560-7917.es.2021.26.26.2100557), 2021-07-01
Supplement: 21-00557_MANDELBOIM-supplement.pdf [file 21-00557_MANDELBOIM-supplement.pdf]

## Supplementary Material

This supplementary material is hosted by *Eurosurveillance* as supporting information alongside the article “Neutralising capacity against Delta (B.1.617.2) and other variants of concern following Comirnaty (BNT162b2, BioNTech/Pfizer) vaccination in health care workers, Israel” on behalf of the authors who remain responsible for the accuracy and appropriateness of the content. The same standards for ethics, copyright, attributions and permissions as for the article apply. Supplements are not edited by Eurosurveillance and the journal is not responsible for the maintenance of any links or email addresses provided therein.

### Supplementary Table 1: Amino acid substitutions of the Delta isolates

Amino acid substitutions were identified in each sequence in comparison to SARS-CoV-2 reference sequence (REF\_NC\_045512.2).

|              |                                                                                                                                                                        |
|--------------|------------------------------------------------------------------------------------------------------------------------------------------------------------------------|
| <b>S1</b>    | N:R385K, ORF7a:L116F, ORF1a:P309L,ORF1a:P1640L,ORF1a:H2092Y,<br>ORF1a:A3209V,ORF1a:V3718A, ORF1b:G662S,ORF1b:H2285Y                                                    |
| <b>S2</b>    | S:T95I, N:G215C, ORF3a:L85F, ORF7b:T40I,ORF1a:A1306S,ORF1a:P2046L,<br>ORF1a:P2287S,ORF1a:V2930L,ORF1a:T3255I,ORF1a:T3646A,<br>ORF1b:P314L,ORF1b:G662S,ORF1b:A1918V     |
| <b>S1+S2</b> | M:I82T,N:D63G,N:R203M,N:D377Y, ORF1b:P314L,ORF1b:G662S,<br>ORF1b:P1000L, ORF3a:S26L,ORF7a:V82A,ORF7a:T120I, S:T19R,S:R158G,<br>S:L452R,S:T478K,S:D614G,S:P681R,S:D950N |

### Supplementary Table 2: GISAID accession numbers of global variant sequences included in the phylogenetic tree

|            |                                                                                                                                                                                                                                                  |
|------------|--------------------------------------------------------------------------------------------------------------------------------------------------------------------------------------------------------------------------------------------------|
| <b>B.1</b> | hCoV-19/France/IDF_PSL_59/2020 EPI_ISL_1015006 2020-03-11<br>hCoV-19/France/IDF_PSL_47/2020 EPI_ISL_1015007 2020-03-20<br>hCoV-19/France/IDF_PSL_77/2020 EPI_ISL_1015008 2020-03-21<br>hCoV-19/France/IDF_PSL_71/2020 EPI_ISL_1015009 2020-03-23 |
|------------|--------------------------------------------------------------------------------------------------------------------------------------------------------------------------------------------------------------------------------------------------|

|                  |                                                                                                                                                                                                                                                                                                                                                                                                                                                                                                                                                                                                                                                                                                                                                                                                                                                                                                                                                                                                                                                                                                                                                                                                                                                                                                                                                                                                                                                                                                                                                                                                                                                                                                                                                                                                                                                                                                                                                                                                                                                                                                                                                                                                                                                                                                                                                                                                                                                                                                                                                                                                                                                                                                                                                                                                                                                                                                                                                                                                                                                                                    |
|------------------|------------------------------------------------------------------------------------------------------------------------------------------------------------------------------------------------------------------------------------------------------------------------------------------------------------------------------------------------------------------------------------------------------------------------------------------------------------------------------------------------------------------------------------------------------------------------------------------------------------------------------------------------------------------------------------------------------------------------------------------------------------------------------------------------------------------------------------------------------------------------------------------------------------------------------------------------------------------------------------------------------------------------------------------------------------------------------------------------------------------------------------------------------------------------------------------------------------------------------------------------------------------------------------------------------------------------------------------------------------------------------------------------------------------------------------------------------------------------------------------------------------------------------------------------------------------------------------------------------------------------------------------------------------------------------------------------------------------------------------------------------------------------------------------------------------------------------------------------------------------------------------------------------------------------------------------------------------------------------------------------------------------------------------------------------------------------------------------------------------------------------------------------------------------------------------------------------------------------------------------------------------------------------------------------------------------------------------------------------------------------------------------------------------------------------------------------------------------------------------------------------------------------------------------------------------------------------------------------------------------------------------------------------------------------------------------------------------------------------------------------------------------------------------------------------------------------------------------------------------------------------------------------------------------------------------------------------------------------------------------------------------------------------------------------------------------------------------|
|                  | <p>hCoV-19/France/IDF_PSL_58/2020 EPI_ISL_1015013 2020-03-19<br/> hCoV-19/France/IDF_PSL_3/2020 EPI_ISL_1015023 2020-03-11<br/> hCoV-19/France/IDF_PSL_160/2020 EPI_ISL_1015048 2020-03-06<br/> hCoV-19/France/IDF_PSL_119/2020 EPI_ISL_1015258 2020-03-23<br/> hCoV-19/Italy/FVG-ICGEB-S1/2020 EPI_ISL_417418 2020-03-01<br/> hCoV-19/Italy/FVG-ICGEB-S5/2020 EPI_ISL_417419 2020-03-01<br/> hCoV-19/Italy/FVG-ICGEB-S8/2020 EPI_ISL_417421 2020-03-01<br/> hCoV-19/Georgia/Tb-1352/2020 EPI_ISL_420140 2020-03-28<br/> hCoV-19/Slovenia/4584/2020 EPI_ISL_420294 2020-03-06<br/> hCoV-19/USA/ID-UW-4486/2020 EPI_ISL_427172 2020-03-29<br/> hCoV-19/Taiwan/TSGH-07/2020 EPI_ISL_427394 2020-03-22<br/> hCoV-19/Taiwan/TSGH-12/2020 EPI_ISL_428229 2020-03-18<br/> hCoV-19/Italy/FVG-ICGEB-S14/2020 EPI_ISL_428853 2020-03-30<br/> hCoV-19/USA/CT-UW-4348/2020 EPI_ISL_430946 2020-03-30<br/> hCoV-19/USA/ID-UW-4402/2020 EPI_ISL_430949 2020-03-29<br/> hCoV-19/USA/OR-UW-4410/2020 EPI_ISL_430950 2020-03-29<br/> hCoV-19/USA/WA-UW-4413/2020 EPI_ISL_430951 2020-03-31<br/> hCoV-19/USA/ID-UW-6349/2020 EPI_ISL_430970 2020-04-01<br/> hCoV-19/Taiwan/TSGH-18/2020 EPI_ISL_436103 2020-03-24<br/> hCoV-19/Taiwan/TSGH-21/2020 EPI_ISL_436106 2020-03-30<br/> hCoV-19/USA/un-UW-4089/2020 EPI_ISL_437818 2020-04-01<br/> hCoV-19/USA/ID-UW-4308/2020 EPI_ISL_437828 2020-03-30<br/> hCoV-19/Sweden/KI-CTMR-V300057201-8E/2020 EPI_ISL_444489 2020-03-30<br/> hCoV-19/Chile/VS-ISPCH-4/2020 EPI_ISL_445287 2020-03-19<br/> hCoV-19/Romania/Bucuresti-4322/2020 EPI_ISL_468136 2020-03-22<br/> hCoV-19/Italy/APU-UniMI-847/2020 EPI_ISL_469022 2020-03-20<br/> hCoV-19/USA/WA-UW-862/2020 EPI_ISL_476937 2020-03-14<br/> hCoV-19/USA/WA-UW-1481/2020 EPI_ISL_477687 2020-03-18<br/> hCoV-19/USA/ID-UW-3204/2020 EPI_ISL_490993 2020-03-26<br/> hCoV-19/Taiwan/NCKUH-005/2020 EPI_ISL_493200 2020-03-18<br/> hCoV-19/Italy/VEN-IZSV-9/2020 EPI_ISL_496482 2020-03-17<br/> hCoV-19/USA/NY-UW-MAYO23/2020 EPI_ISL_500504 2020-03-18<br/> hCoV-19/USA/TX-GCID-192000159/2020 EPI_ISL_501168 2020-03-30<br/> hCoV-19/Italy/APU-UniMI-62PT/2020 EPI_ISL_525571 2020-03-28<br/> hCoV-19/SaudiArabia/KAUST-MADINAH669/2020 EPI_ISL_677973 2020-04-01<br/> hCoV-19/Italy/TUS-UniSi07/2020 EPI_ISL_803886 2020-03-18<br/> hCoV-19/Italy/VEN-PD01/2020 EPI_ISL_856712 2020-03-24<br/> hCoV-19/Italy/CAM_CRGS_2/2020 EPI_ISL_876042 2020-03-14<br/> hCoV-19/Italy/CAM_CRGS_3/2020 EPI_ISL_876043 2020-03-14<br/> hCoV-19/Italy/CAM-CRGS-36/2020 EPI_ISL_876977 2020-03-19<br/> hCoV-19/Italy/CAM-CRGS-12/2020 EPI_ISL_876978 2020-03-15<br/> hCoV-19/Italy/CAM-CRGS-29/2020 EPI_ISL_876993 2020-03-18<br/> hCoV-19/Italy/CAM-CRGS-31/2020 EPI_ISL_876997 2020-03-19<br/> hCoV-19/Italy/CAM-CRGS-37/2020 EPI_ISL_876999 2020-03-19<br/> hCoV-19/Italy/CAM-CRGS-46/2020 EPI_ISL_877010 2020-03-25<br/> hCoV-19/Italy/CAM-CRGS-57/2020 EPI_ISL_877011 2020-03-25<br/> hCoV-19/Italy/CAM-CRGS-55/2020 EPI_ISL_918413 2020-03-19<br/> hCoV-19/Italy/CAM-CRGS-63/2020 EPI_ISL_918416 2020-03-25</p> |
| <b>B.1.617.1</b> | <p>hCoV-19/India/MH-NCCS-87477/2021 EPI_ISL_1415316 2021-02-16<br/> hCoV-19/India/MH-NCCS-87475/2021 EPI_ISL_1415323 2021-02-16<br/> hCoV-19/England/CAMC-14A6515/2021 EPI_ISL_1504891 2021-03-28<br/> hCoV-19/England/CAMC-14ABA6C/2021 EPI_ISL_1505110 2021-03-31<br/> hCoV-19/USA/DE-DHSS-B1069933/2021 EPI_ISL_1511179 2021-03-29<br/> hCoV-19/USA/GA-CDC-STM-000041012/2021 EPI_ISL_1512225 2021-03-21</p>                                                                                                                                                                                                                                                                                                                                                                                                                                                                                                                                                                                                                                                                                                                                                                                                                                                                                                                                                                                                                                                                                                                                                                                                                                                                                                                                                                                                                                                                                                                                                                                                                                                                                                                                                                                                                                                                                                                                                                                                                                                                                                                                                                                                                                                                                                                                                                                                                                                                                                                                                                                                                                                                    |

hCoV-19/England/CAMC-14B59F9/2021|EPI\_ISL\_1517951|2021-03-31  
hCoV-19/Singapore/395/2021|EPI\_ISL\_1524796|2021-03-30  
hCoV-19/India/MH-NCCS-9844/2021|EPI\_ISL\_1533801|2021-02-25  
hCoV-19/England/CAMC-14C99D4/2021|EPI\_ISL\_1535006|2021-04-03  
hCoV-19/England/CAMC-14CAB46/2021|EPI\_ISL\_1535035|2021-04-03  
hCoV-19/England/MILK-14C78AC/2021|EPI\_ISL\_1536737|2021-04-03  
hCoV-19/England/RAND-14C7156/2021|EPI\_ISL\_1537092|2021-04-03  
hCoV-19/India/MH-NCCS-138900/2021|EPI\_ISL\_1544042|2021-02-26  
hCoV-19/India/MH-NCCS-302014350031820/2021|EPI\_ISL\_1544065|2021-02-24  
hCoV-19/India/MH-NCCS-RT231527/2021|EPI\_ISL\_1544068|2021-02-26  
hCoV-19/Scotland/QEUIH-14C89B7/2021|EPI\_ISL\_1544937|2021-04-02  
hCoV-19/India/MH-NEERI-NGP-40449/2021|EPI\_ISL\_1547802|2021-03-10  
hCoV-19/India/MH-NEERI-NGP-41290/2021|EPI\_ISL\_1547805|2021-03-13  
hCoV-19/USA/CA-CDC-STM-000042578/2021|EPI\_ISL\_1576374|2021-03-24  
hCoV-19/USA/PA-CDC-STM-000043645/2021|EPI\_ISL\_1581188|2021-03-24  
hCoV-19/England/MILK-14D984D/2021|EPI\_ISL\_1584428|2021-04-05  
hCoV-19/India/WB-1931300251031/2021|EPI\_ISL\_1589857|2021-03-25  
hCoV-19/India/WB-1931500943932/2021|EPI\_ISL\_1589878|2021-03-12  
hCoV-19/India/WB-1931300249539/2021|EPI\_ISL\_1589884|2021-03-22  
hCoV-19/India/WB-1931300251000/2021|EPI\_ISL\_1589887|2021-03-25  
hCoV-19/India/WB-1931300251003/2021|EPI\_ISL\_1589888|2021-03-25  
hCoV-19/India/WB-1931300251005/2021|EPI\_ISL\_1589889|2021-03-25  
hCoV-19/India/WB-1931300251518/2021|EPI\_ISL\_1589893|2021-03-26  
hCoV-19/India/WB-1931300252032/2021|EPI\_ISL\_1589896|2021-03-27  
hCoV-19/India/WB-1931500981090/2021|EPI\_ISL\_1589902|2021-03-22  
hCoV-19/India/WB-1930400368956/2021|EPI\_ISL\_1589904|2021-02-26  
hCoV-19/India/WB-1931500990949/2021|EPI\_ISL\_1589906|2021-03-24  
hCoV-19/India/WB-1931501009007/2021|EPI\_ISL\_1589910|2021-03-29  
hCoV-19/India/WB-1931501009410/2021|EPI\_ISL\_1589911|2021-03-29  
hCoV-19/India/WB-1930300560861/2021|EPI\_ISL\_1589914|2021-03-09  
hCoV-19/India/WB-1930300562863/2021|EPI\_ISL\_1589915|2021-03-10  
hCoV-19/India/WB-1931500931775/2021|EPI\_ISL\_1589916|2021-03-09  
hCoV-19/India/WB-1931500948337/2021|EPI\_ISL\_1589919|2021-03-13  
hCoV-19/India/WB-1930300556491/2021|EPI\_ISL\_1589920|2021-03-07  
hCoV-19/India/WB-1930300559242/2021|EPI\_ISL\_1589921|2021-03-08  
hCoV-19/India/WB-1930300569917/2021|EPI\_ISL\_1589924|2021-03-13  
hCoV-19/India/WB-1930300586246/2021|EPI\_ISL\_1589926|2021-03-19  
hCoV-19/India/WB-1930300585938/2021|EPI\_ISL\_1589928|2021-03-19  
hCoV-19/India/WB-1970400172259/2021|EPI\_ISL\_1589932|2021-03-14  
hCoV-19/India/WB-1931500942112/2021|EPI\_ISL\_1589935|2021-03-12  
hCoV-19/India/WB-1930400389876/2021|EPI\_ISL\_1589940|2021-03-11  
hCoV-19/India/WB-1930400403451/2021|EPI\_ISL\_1589941|2021-03-19  
hCoV-19/USA/GA-CDC-STM-000046368/2021|EPI\_ISL\_1593133|2021-03-31  
hCoV-19/Wales/CAMC-14D5F6A/2021|EPI\_ISL\_1595472|2021-04-05  
hCoV-19/Belgium/MBLG36792/2021|EPI\_ISL\_1599177|2021-03-25  
hCoV-19/USA/WI-CDC-LC0035686/2021|EPI\_ISL\_1608983|2021-03-27  
hCoV-19/USA/WA-UW-2021033003742/2021|EPI\_ISL\_1616618|2021-03-30  
hCoV-19/USA/WA-UW-2021040107121/2021|EPI\_ISL\_1620998|2021-04-01  
hCoV-19/USA/WA-UW-2021040100156/2021|EPI\_ISL\_1620999|2021-04-01  
hCoV-19/England/RAND-14F1A67/2021|EPI\_ISL\_1631230|2021-04-09  
hCoV-19/England/RAND-14F18D6/2021|EPI\_ISL\_1634737|2021-04-10  
hCoV-19/Germany/BY-RKI-I-076082/2021|EPI\_ISL\_1641831|2021-04-06  
hCoV-19/SouthKorea/KDCA2949/2021|EPI\_ISL\_1647348|2021-03-26  
hCoV-19/SouthKorea/KDCA2950/2021|EPI\_ISL\_1647349|2021-04-05

hCoV-19/SouthKorea/KDCA2951/2021 | EPI\_ISL\_1647350 | 2021-04-06  
hCoV-19/SouthKorea/KDCA2952/2021 | EPI\_ISL\_1647351 | 2021-04-06  
hCoV-19/SouthKorea/KDCA2953/2021 | EPI\_ISL\_1647352 | 2021-04-06  
hCoV-19/England/CAMC-14F8523/2021 | EPI\_ISL\_1652951 | 2021-04-14  
hCoV-19/England/CAMC-14F3C7E/2021 | EPI\_ISL\_1653362 | 2021-04-09  
hCoV-19/Switzerland/SO-ETHZ-560325/2021 | EPI\_ISL\_1658295 | 2021-03-30  
hCoV-19/Australia/NSW-R0186/2021 | EPI\_ISL\_1660404 | 2021-04-07  
hCoV-19/India/CT-ILSGS00361/2021 | EPI\_ISL\_1662307 | 2021-02-23  
hCoV-19/India/CT-ILSGS00371/2021 | EPI\_ISL\_1662316 | 2021-02-23  
hCoV-19/India/CT-ILSGS00373/2021 | EPI\_ISL\_1662318 | 2021-02-25  
hCoV-19/India/CT-ILSGS00378/2021 | EPI\_ISL\_1662322 | 2021-02-18  
hCoV-19/India/CT-ILSGS00482/2021 | EPI\_ISL\_1662410 | 2021-02-15  
hCoV-19/India/CT-ILSGS00494/2021 | EPI\_ISL\_1662420 | 2021-02-22  
hCoV-19/India/OR-ILSGS00645/2021 | EPI\_ISL\_1662427 | 2021-03-25  
hCoV-19/India/OR-ILSGS00649/2021 | EPI\_ISL\_1662431 | 2021-03-25  
hCoV-19/India/ILSGS00512/2021 | EPI\_ISL\_1663243 | 2021-03-05  
hCoV-19/India/ILSGS00522/2021 | EPI\_ISL\_1663250 | 2021-03-06  
hCoV-19/India/ILSGS00622/2021 | EPI\_ISL\_1663315 | 2021-03-15  
hCoV-19/India/ILSGS00623/2021 | EPI\_ISL\_1663316 | 2021-03-15  
hCoV-19/India/ILSGS00628/2021 | EPI\_ISL\_1663320 | 2021-03-10  
hCoV-19/India/ILSGS00753/2021 | EPI\_ISL\_1663359 | 2021-03-22  
hCoV-19/India/ILSGS00758/2021 | EPI\_ISL\_1663362 | 2021-03-19  
hCoV-19/India/ILSGS00762/2021 | EPI\_ISL\_1663363 | 2021-03-07  
hCoV-19/India/ILSGS00765/2021 | EPI\_ISL\_1663365 | 2021-03-08  
hCoV-19/India/ILSGS00769/2021 | EPI\_ISL\_1663368 | 2021-03-07  
hCoV-19/India/ILSGS00770/2021 | EPI\_ISL\_1663369 | 2021-03-07  
hCoV-19/India/ILSGS00783/2021 | EPI\_ISL\_1663381 | 2021-03-02  
hCoV-19/India/ILSGS00784/2021 | EPI\_ISL\_1663382 | 2021-03-02  
hCoV-19/India/ILSGS00789/2021 | EPI\_ISL\_1663387 | 2021-03-03  
hCoV-19/India/ILSGS00793/2021 | EPI\_ISL\_1663391 | 2021-03-03  
hCoV-19/India/ILSGS00797/2021 | EPI\_ISL\_1663395 | 2021-03-04  
hCoV-19/India/ILSGS00807/2021 | EPI\_ISL\_1663406 | 2021-03-05  
hCoV-19/India/ILSGS00808/2021 | EPI\_ISL\_1663407 | 2021-03-06  
hCoV-19/India/ILSGS00809/2021 | EPI\_ISL\_1663408 | 2021-03-05  
hCoV-19/India/ILSGS00811/2021 | EPI\_ISL\_1663410 | 2021-03-06  
hCoV-19/India/ILSGS00812/2021 | EPI\_ISL\_1663411 | 2021-03-07  
hCoV-19/India/ILSGS00822/2021 | EPI\_ISL\_1663420 | 2021-03-07  
hCoV-19/India/ILSGS00824/2021 | EPI\_ISL\_1663422 | 2021-03-08  
hCoV-19/India/ILSGS00825/2021 | EPI\_ISL\_1663423 | 2021-03-08  
hCoV-19/India/ILSGS00826/2021 | EPI\_ISL\_1663424 | 2021-03-05  
hCoV-19/India/ILSGS00832/2021 | EPI\_ISL\_1663429 | 2021-03-05  
hCoV-19/India/ILSGS00839/2021 | EPI\_ISL\_1663434 | 2021-03-05  
hCoV-19/India/ILSGS00850/2021 | EPI\_ISL\_1663444 | 2021-03-05  
hCoV-19/India/ILSGS00857/2021 | EPI\_ISL\_1663448 | 2021-03-05  
hCoV-19/India/ILSGS00867/2021 | EPI\_ISL\_1663454 | 2021-03-06  
hCoV-19/India/ILSGS00868/2021 | EPI\_ISL\_1663455 | 2021-03-06  
hCoV-19/India/ILSGS00871/2021 | EPI\_ISL\_1663458 | 2021-03-05  
hCoV-19/India/ILSGS00876/2021 | EPI\_ISL\_1663461 | 2021-03-05  
hCoV-19/India/ILSGS00878/2021 | EPI\_ISL\_1663463 | 2021-03-06  
hCoV-19/India/ILSGS00885/2021 | EPI\_ISL\_1663469 | 2021-03-07  
hCoV-19/India/ILSGS00887/2021 | EPI\_ISL\_1663471 | 2021-03-07  
hCoV-19/India/ILSGS00893/2021 | EPI\_ISL\_1663476 | 2021-02-20  
hCoV-19/India/ILSGS00910/2021 | EPI\_ISL\_1663489 | 2021-04-02  
hCoV-19/India/ILSGS00913/2021 | EPI\_ISL\_1663492 | 2021-04-02

hCoV-19/India/ILSGS00933/2021|EPI\_ISL\_1663509|2021-03-16  
hCoV-19/India/ILSGS00945/2021|EPI\_ISL\_1663518|2021-03-19  
hCoV-19/India/ILSGS00949/2021|EPI\_ISL\_1663522|2021-03-22  
hCoV-19/India/ILSGS00957/2021|EPI\_ISL\_1663530|2021-03-26  
hCoV-19/India/MH-ICMR-MGIMSF1/2021|EPI\_ISL\_1669766|2021-02  
hCoV-19/India/MH-ICMR-MGIMSF5/2021|EPI\_ISL\_1669767|2021-02  
hCoV-19/India/MH-ICMR-MGIMSF6/2021|EPI\_ISL\_1669768|2021-02  
hCoV-19/India/MH-ICMR-MGIMSF7/2021|EPI\_ISL\_1669769|2021-02  
hCoV-19/India/MH-ICMR-MGIMSF8/2021|EPI\_ISL\_1669770|2021-02  
hCoV-19/India/MH-ICMR-2747200103301/2021|EPI\_ISL\_1669775|2021-02  
hCoV-19/India/MH-ICMR-NGP173249/2021|EPI\_ISL\_1669777|2021-02  
hCoV-19/India/MH-ICMR-NGP174677/2021|EPI\_ISL\_1669778|2021-02  
hCoV-19/USA/WA-UW-2021041209221/2021|EPI\_ISL\_1670838|2021-04-12  
hCoV-19/USA/CA-Stanford-15\_S12/2021|EPI\_ISL\_1675224|2021-03-12  
hCoV-19/USA/CA-Stanford-15\_S27/2021|EPI\_ISL\_1675225|2021-03-16  
hCoV-19/USA/CA-Stanford-19\_S07/2021|EPI\_ISL\_1675226|2021-04-06  
hCoV-19/USA/CA-Stanford-19\_S21/2021|EPI\_ISL\_1675227|2021-04-07  
hCoV-19/India/GJ-GBRC540a/2021|EPI\_ISL\_1677768|2021-04-01  
hCoV-19/USA/FL-CDC-STM-000049137/2021|EPI\_ISL\_1679168|2021-04-01  
hCoV-19/USA/WA-UW-2021040707686/2021|EPI\_ISL\_1680320|2021-04-07  
hCoV-19/USA/WA-UW-2021040824300/2021|EPI\_ISL\_1680383|2021-04-08  
hCoV-19/USA/WA-UW-2021040875818/2021|EPI\_ISL\_1680385|2021-04-08  
hCoV-19/USA/WI-CDC-LC0041862/2021|EPI\_ISL\_1682101|2021-04-02  
hCoV-19/England/CAMC-15027A7/2021|EPI\_ISL\_1697772|2021-04-12  
hCoV-19/England/CAMC-1508E15/2021|EPI\_ISL\_1698270|2021-04-12  
hCoV-19/England/CAMC-1508D54/2021|EPI\_ISL\_1698328|2021-04-14  
hCoV-19/Wales/ALDP-14F4484/2021|EPI\_ISL\_1700508|2021-04-09  
hCoV-19/Wales/ALDP-14F482E/2021|EPI\_ISL\_1700513|2021-04-09  
hCoV-19/USA/CA-Stanford-15\_S45/2021|EPI\_ISL\_1701681|2021-03-28  
hCoV-19/Netherlands/NH-RIVM-26500/2021|EPI\_ISL\_1705973|2021-04-06  
hCoV-19/Netherlands/NH-RIVM-26512/2021|EPI\_ISL\_1705985|2021-04-06  
hCoV-19/Cambodia/381152/2021|EPI\_ISL\_1706599|2021-04-05  
hCoV-19/Greece/181/2021|EPI\_ISL\_1716737|2021-04-06  
hCoV-19/England/ALDP-150F6BC/2021|EPI\_ISL\_1718340|2021-04-15  
hCoV-19/England/MILK-150FA47/2021|EPI\_ISL\_1718386|2021-04-14  
hCoV-19/England/MILK-151258C/2021|EPI\_ISL\_1719083|2021-04-16  
hCoV-19/England/MILK-1512D84/2021|EPI\_ISL\_1719097|2021-04-17  
hCoV-19/Portugal/PT5880/2021|EPI\_ISL\_1739170|2021-04-09  
hCoV-19/Portugal/PT5891/2021|EPI\_ISL\_1739180|2021-04-13  
hCoV-19/England/ALDP-15146D2/2021|EPI\_ISL\_1741248|2021-04-16  
hCoV-19/England/ALDP-15146E1/2021|EPI\_ISL\_1741251|2021-04-15  
hCoV-19/England/MILK-1517684/2021|EPI\_ISL\_1741365|2021-04-18  
hCoV-19/England/MILK-15176DF/2021|EPI\_ISL\_1741430|2021-04-18  
hCoV-19/Scotland/QEUA-1506F50/2021|EPI\_ISL\_1742109|2021-04-14  
hCoV-19/Scotland/CAMC-1502ADB/2021|EPI\_ISL\_1742203|2021-04-11  
hCoV-19/Scotland/CAMC-1507BF1/2021|EPI\_ISL\_1742292|2021-04-13  
hCoV-19/Belgium/UZA-UA-CV2066039473/2021|EPI\_ISL\_1745202|2021-03-29  
hCoV-19/Italy/VEN-IZSve-21RS970-9\_VI/2021|EPI\_ISL\_1745236|2021-04-14  
hCoV-19/England/MILK-151C9D1/2021|EPI\_ISL\_1758222|2021-04-05  
hCoV-19/England/MILK-151C84D/2021|EPI\_ISL\_1758228|2021-04-06  
hCoV-19/USA/WA-UW-2021041090429/2021|EPI\_ISL\_1785703|2021-04-10  
hCoV-19/USA/WA-UW-2021041585567/2021|EPI\_ISL\_1785914|2021-04-15  
hCoV-19/Malaysia/IMR\_WC185230/2021|EPI\_ISL\_1787254|2021-04-10  
hCoV-19/USA/WA-UW-2021040809736/2021|EPI\_ISL\_1789270|2021-04-08

|                  |                                                                                                                                                                                                                                                                                                                                                                                                                                                                                                                                                                                                                                                                                                                                                                                                                                                                                                                                                                                                                                                                                                                                                                                                                                                                                                                                                                                                                                                                                                                                                                                                                                                                                                                                                                                                                                                                                                                                                                                                                                                                                                                                                                                                                                                                                                                                                                                                                                                                                                                                                                                                                                                                 |
|------------------|-----------------------------------------------------------------------------------------------------------------------------------------------------------------------------------------------------------------------------------------------------------------------------------------------------------------------------------------------------------------------------------------------------------------------------------------------------------------------------------------------------------------------------------------------------------------------------------------------------------------------------------------------------------------------------------------------------------------------------------------------------------------------------------------------------------------------------------------------------------------------------------------------------------------------------------------------------------------------------------------------------------------------------------------------------------------------------------------------------------------------------------------------------------------------------------------------------------------------------------------------------------------------------------------------------------------------------------------------------------------------------------------------------------------------------------------------------------------------------------------------------------------------------------------------------------------------------------------------------------------------------------------------------------------------------------------------------------------------------------------------------------------------------------------------------------------------------------------------------------------------------------------------------------------------------------------------------------------------------------------------------------------------------------------------------------------------------------------------------------------------------------------------------------------------------------------------------------------------------------------------------------------------------------------------------------------------------------------------------------------------------------------------------------------------------------------------------------------------------------------------------------------------------------------------------------------------------------------------------------------------------------------------------------------|
|                  | <p>hCoV-19/USA/WA-UW-2021041268513/2021 EPI_ISL_1789413 2021-04-12<br/> hCoV-19/USA/WA-UW-2021041244403/2021 EPI_ISL_1789415 2021-04-12<br/> hCoV-19/England/MILK-151F58F/2021 EPI_ISL_1790246 2021-04-09<br/> hCoV-19/England/MILK-1523236/2021 EPI_ISL_1790678 2021-04-20<br/> hCoV-19/Switzerland/ZH-UZH-IMV-3ba43fa0/2021 EPI_ISL_1791067 2021-03-29<br/> hCoV-19/Netherlands/NB-RIVM-27595/2021 EPI_ISL_1792908 2021-04-15<br/> hCoV-19/USA/WI-WSLH-213515/2021 EPI_ISL_1794390 2021-03-31<br/> hCoV-19/USA/FL-CDC-STM-000053252/2021 EPI_ISL_1796460 2021-04-09<br/> hCoV-19/USA/WI-CDC-LC0046190/2021 EPI_ISL_1800009 2021-04-07<br/> hCoV-19/USA/VA-CDC-LC0047059/2021 EPI_ISL_1800850 2021-04-14<br/> hCoV-19/USA/IL-CDC-STM-000053846/2021 EPI_ISL_1804291 2021-04-11<br/> hCoV-19/USA/CA-CDC-STM-000054394/2021 EPI_ISL_1804713 2021-04-11<br/> hCoV-19/England/MILK-1528617/2021 EPI_ISL_1806481 2021-04-21<br/> hCoV-19/England/ALDP-152BE1C/2021 EPI_ISL_1806530 2021-04-22<br/> hCoV-19/England/ALDP-152C974/2021 EPI_ISL_1806669 2021-04-21</p>                                                                                                                                                                                                                                                                                                                                                                                                                                                                                                                                                                                                                                                                                                                                                                                                                                                                                                                                                                                                                                                                                                                                                                                                                                                                                                                                                                                                                                                                                                                                                                                                 |
| <b>B.1.617.2</b> | <p>hCoV-19/USA/MA-CDC-STM-000044850/2021 EPI_ISL_1592421 2021-03-28<br/> hCoV-19/England/CAMC-14E338B/2021 EPI_ISL_1594728 2021-04-06<br/> hCoV-19/England/CAMC-14E2F97/2021 EPI_ISL_1594918 2021-04-06<br/> hCoV-19/USA/NJ-CDC-LC0038223/2021 EPI_ISL_1611370 2021-03-31<br/> hCoV-19/USA/IN-CDC-STM-000045992/2021 EPI_ISL_1615349 2021-03-29<br/> hCoV-19/Australia/NSW4469/2021 EPI_ISL_1615596 2021-04-13<br/> hCoV-19/England/CAMC-14E7B61/2021 EPI_ISL_1615751 2021-04-08<br/> hCoV-19/England/CAMC-14E7A0A/2021 EPI_ISL_1615877 2021-04-08<br/> hCoV-19/USA/WA-UW-2021040308606/2021 EPI_ISL_1620980 2021-04-03<br/> hCoV-19/England/ALDP-14EDD1A/2021 EPI_ISL_1631042 2021-04-10<br/> hCoV-19/England/RAND-14F1AD0/2021 EPI_ISL_1631164 2021-04-09<br/> hCoV-19/England/CAMC-14E7563/2021 EPI_ISL_1631219 2021-04-07<br/> hCoV-19/England/MILK-14BF397/2021 EPI_ISL_1631645 2021-04-03<br/> hCoV-19/England/RAND-14DD366/2021 EPI_ISL_1631836 2021-04-06<br/> hCoV-19/England/RAND-14E21BF/2021 EPI_ISL_1632122 2021-04-07<br/> hCoV-19/England/RAND-14E1D70/2021 EPI_ISL_1632256 2021-04-07<br/> hCoV-19/Australia/NSW4474/2021 EPI_ISL_1633348 2021-04-16<br/> hCoV-19/Australia/NSW4485/2021 EPI_ISL_1633353 2021-04-16<br/> hCoV-19/England/MILK-14F617C/2021 EPI_ISL_1634507 2021-04-11<br/> hCoV-19/England/QEUEH-14E86C9/2021 EPI_ISL_1634920 2021-04-07<br/> hCoV-19/Scotland/QEUEH-14E2498/2021 EPI_ISL_1635330 2021-04-08<br/> hCoV-19/England/ALDP-14FC413/2021 EPI_ISL_1652724 2021-04-10<br/> hCoV-19/England/ALDP-14FCF9A/2021 EPI_ISL_1652738 2021-04-12<br/> hCoV-19/England/ALDP-14FCFD6/2021 EPI_ISL_1652763 2021-04-12<br/> hCoV-19/England/ALDP-14FC659/2021 EPI_ISL_1652890 2021-04-10<br/> hCoV-19/England/RAND-14FD37F/2021 EPI_ISL_1652897 2021-04-12<br/> hCoV-19/England/CAMC-14F84CC/2021 EPI_ISL_1652981 2021-04-11<br/> hCoV-19/England/CAMC-14F86F3/2021 EPI_ISL_1652993 2021-04-13<br/> hCoV-19/England/CAMC-14E66AD/2021 EPI_ISL_1653090 2021-04-06<br/> hCoV-19/England/ALDP-14F8A06/2021 EPI_ISL_1653187 2021-04-11<br/> hCoV-19/England/CAMC-14E69A4/2021 EPI_ISL_1653197 2021-04-06<br/> hCoV-19/Wales/CAMC-14E8016/2021 EPI_ISL_1653755 2021-04-08<br/> hCoV-19/India/OR-ILSGS00333/2021 EPI_ISL_1662284 2021-03-06<br/> hCoV-19/India/CT-ILSGS00342/2021 EPI_ISL_1662291 2021-03-14<br/> hCoV-19/India/OR-ILSGS00682/2021 EPI_ISL_1662451 2021-03-18<br/> hCoV-19/India/ILSGS00519/2021 EPI_ISL_1663247 2021-03-08<br/> hCoV-19/India/ILSGS00614/2021 EPI_ISL_1663307 2021-03-15<br/> hCoV-19/India/ILSGS00615/2021 EPI_ISL_1663308 2021-03-15<br/> hCoV-19/India/ILSGS00766/2021 EPI_ISL_1663366 2021-03-08</p> |

hCoV-19/India/ILSGS00767/2021|EPI\_ISL\_1663367|2021-03-08  
hCoV-19/India/ILSGS00912/2021|EPI\_ISL\_1663491|2021-04-02  
hCoV-19/India/ILSGS00922/2021|EPI\_ISL\_1663498|2021-03-24  
hCoV-19/India/ILSGS00925/2021|EPI\_ISL\_1663501|2021-03-28  
hCoV-19/India/ILSGS00926/2021|EPI\_ISL\_1663502|2021-03-28  
hCoV-19/India/ILSGS00931/2021|EPI\_ISL\_1663507|2021-03-16  
hCoV-19/India/ILSGS00941/2020|EPI\_ISL\_1663516|2020-12-12  
hCoV-19/India/ILSGS00950/2021|EPI\_ISL\_1663523|2021-03-20  
hCoV-19/India/ILSGS00956/2021|EPI\_ISL\_1663529|2021-03-25  
hCoV-19/India/ILSGS00961/2021|EPI\_ISL\_1663534|2021-03-28  
hCoV-19/India/ILSGS00969/2021|EPI\_ISL\_1663541|2021-03-22  
hCoV-19/India/ILSGS00971/2021|EPI\_ISL\_1663543|2021-03-19  
hCoV-19/India/ILSGS00977/2021|EPI\_ISL\_1663548|2021-02-19  
hCoV-19/India/ILSGS00978/2021|EPI\_ISL\_1663549|2021-02-19  
hCoV-19/India/ILSGS00983/2021|EPI\_ISL\_1663552|2021-03-25  
hCoV-19/India/ILSGS00984/2021|EPI\_ISL\_1663553|2021-03-25  
hCoV-19/India/ILSGS00985/2021|EPI\_ISL\_1663554|2021-03-25  
hCoV-19/India/ILSGS00986/2021|EPI\_ISL\_1663555|2021-03-25  
hCoV-19/India/ILSGS00987/2021|EPI\_ISL\_1663557|2021-03-25  
hCoV-19/India/ILSGS00988/2021|EPI\_ISL\_1663558|2021-03-25  
hCoV-19/India/ILSGS00991/2021|EPI\_ISL\_1663561|2021-03-25  
hCoV-19/India/ILSGS00992/2021|EPI\_ISL\_1663562|2021-03-25  
hCoV-19/India/ILSGS00993/2021|EPI\_ISL\_1663563|2021-03-25  
hCoV-19/India/ILSGS00996/2021|EPI\_ISL\_1663564|2021-03-29  
hCoV-19/USA/WA-UW-2021041002621/2021|EPI\_ISL\_1670827|2021-04-10  
hCoV-19/England/CAMC-14E66BC/2021|EPI\_ISL\_1673061|2021-04-06  
hCoV-19/Scotland/CAMC-14E685C/2021|EPI\_ISL\_1673100|2021-04-04  
hCoV-19/USA/NY-CDC-2-4177223/2021|EPI\_ISL\_1678079|2021-03-16  
hCoV-19/USA/IN-CDC-STM-000049219/2021|EPI\_ISL\_1679967|2021-04-01  
hCoV-19/USA/IN-CDC-STM-000049216/2021|EPI\_ISL\_1680048|2021-04-01  
hCoV-19/USA/NC-CDC-LC0043123/2021|EPI\_ISL\_1683986|2021-04-09  
hCoV-19/USA/NV-CDC-LC0044049/2021|EPI\_ISL\_1684717|2021-04-05  
hCoV-19/England/CAMC-1502B8D/2021|EPI\_ISL\_1697963|2021-04-12  
hCoV-19/England/CAMC-1502BD8/2021|EPI\_ISL\_1697964|2021-04-13  
hCoV-19/England/MILK-150A709/2021|EPI\_ISL\_1697977|2021-04-14  
hCoV-19/England/MILK-1509FF3/2021|EPI\_ISL\_1698144|2021-04-15  
hCoV-19/England/CAMC-1508B87/2021|EPI\_ISL\_1698273|2021-04-14  
hCoV-19/England/CAMC-1508EBB/2021|EPI\_ISL\_1698283|2021-04-13  
hCoV-19/England/ALDP-150864A/2021|EPI\_ISL\_1698325|2021-04-14  
hCoV-19/England/CAMC-1508DDC/2021|EPI\_ISL\_1698361|2021-04-13  
hCoV-19/England/CAMC-1508D72/2021|EPI\_ISL\_1698410|2021-04-13  
hCoV-19/England/ALDP-15089D8/2021|EPI\_ISL\_1698416|2021-04-14  
hCoV-19/England/CAMC-1507C85/2021|EPI\_ISL\_1698429|2021-04-14  
hCoV-19/England/CAMC-150904B/2021|EPI\_ISL\_1698436|2021-04-17  
hCoV-19/England/ALDP-1507FD7/2021|EPI\_ISL\_1698440|2021-04-15  
hCoV-19/England/ALDP-14FB55D/2021|EPI\_ISL\_1699101|2021-04-12  
hCoV-19/England/MILK-15060E4/2021|EPI\_ISL\_1699753|2021-04-13  
hCoV-19/England/MILK-1506406/2021|EPI\_ISL\_1699770|2021-04-14  
hCoV-19/England/MILK-14F524D/2021|EPI\_ISL\_1699979|2021-04-11  
hCoV-19/England/ALDP-14F228C/2021|EPI\_ISL\_1700236|2021-04-11  
hCoV-19/England/RAND-14F1DE6/2021|EPI\_ISL\_1700313|2021-04-11  
hCoV-19/USA/OK-CDC-2-4195490/2021|EPI\_ISL\_1711803|2021-04-05  
hCoV-19/USA/WA-UW-2021040810481/2021|EPI\_ISL\_1715449|2021-04-08  
hCoV-19/England/MILK-1514766/2021|EPI\_ISL\_1718344|2021-04-17

hCoV-19/England/ALDP-1513697/2021|EPI\_ISL\_1718501|2021-04-16  
hCoV-19/England/ALDP-150F84D/2021|EPI\_ISL\_1718588|2021-04-15  
hCoV-19/England/ALDP-151837D/2021|EPI\_ISL\_1718630|2021-04-18  
hCoV-19/England/ALDP-1511F16/2021|EPI\_ISL\_1718683|2021-04-16  
hCoV-19/England/MILK-15152A0/2021|EPI\_ISL\_1718691|2021-04-16  
hCoV-19/England/ALDP-150EDE5/2021|EPI\_ISL\_1718721|2021-04-15  
hCoV-19/England/ALDP-151851D/2021|EPI\_ISL\_1718882|2021-04-17  
hCoV-19/England/MILK-151413B/2021|EPI\_ISL\_1718934|2021-04-17  
hCoV-19/England/MILK-151407A/2021|EPI\_ISL\_1718935|2021-04-17  
hCoV-19/England/MILK-1512443/2021|EPI\_ISL\_1718951|2021-04-17  
hCoV-19/England/CAMC-1510A43/2021|EPI\_ISL\_1718959|2021-04-16  
hCoV-19/England/MILK-15128CF/2021|EPI\_ISL\_1718987|2021-04-17  
hCoV-19/England/CAMC-1510B6E/2021|EPI\_ISL\_1718989|2021-04-16  
hCoV-19/England/MILK-1513B89/2021|EPI\_ISL\_1719015|2021-04-16  
hCoV-19/England/CAMC-1510A07/2021|EPI\_ISL\_1719027|2021-04-16  
hCoV-19/England/CAMC-15109FB/2021|EPI\_ISL\_1719042|2021-04-16  
hCoV-19/England/CAMC-1510A8F/2021|EPI\_ISL\_1719134|2021-04-16  
hCoV-19/England/CAMC-1510AF8/2021|EPI\_ISL\_1719142|2021-04-16  
hCoV-19/England/MILK-15140E3/2021|EPI\_ISL\_1719162|2021-04-17  
hCoV-19/England/CAMC-150D690/2021|EPI\_ISL\_1719584|2021-04-14  
hCoV-19/England/ALDP-150DBDD/2021|EPI\_ISL\_1719616|2021-04-15  
hCoV-19/England/CAMC-150D241/2021|EPI\_ISL\_1719618|2021-04-14  
hCoV-19/England/QEUA-150C51C/2021|EPI\_ISL\_1719728|2021-04-17  
hCoV-19/England/CAMC-1502B32/2021|EPI\_ISL\_1719736|2021-04-12  
hCoV-19/Germany/BY-RKI-I-085003/2021|EPI\_ISL\_1722241|2021-04-09  
hCoV-19/Germany/NW-RKI-I-093994/2021|EPI\_ISL\_1728331|2021-04-20  
hCoV-19/Wales/PHWC-PYD79R/2021|EPI\_ISL\_1730635|2021-04-14  
hCoV-19/England/PHWC-PYD9D5/2021|EPI\_ISL\_1730650|2021-04-15  
hCoV-19/USA/IL-CDC-STM-000051595/2021|EPI\_ISL\_1735500|2021-04-06  
hCoV-19/England/CAMC-151FDF0/2021|EPI\_ISL\_1740580|2021-04-22  
hCoV-19/England/RAND-1520530/2021|EPI\_ISL\_1740633|2021-04-19  
hCoV-19/England/ALDP-15202B1/2021|EPI\_ISL\_1740654|2021-04-19  
hCoV-19/England/RAND-1520785/2021|EPI\_ISL\_1740691|2021-04-19  
hCoV-19/England/QEUA-151F8A4/2021|EPI\_ISL\_1740738|2021-04-20  
hCoV-19/England/ALDP-151FF27/2021|EPI\_ISL\_1740750|2021-04-20  
hCoV-19/England/RAND-152054F/2021|EPI\_ISL\_1740754|2021-04-19  
hCoV-19/England/ALDP-152007B/2021|EPI\_ISL\_1740763|2021-04-20  
hCoV-19/England/RAND-1520688/2021|EPI\_ISL\_1740766|2021-04-19  
hCoV-19/England/ALDP-152022A/2021|EPI\_ISL\_1740778|2021-04-19  
hCoV-19/England/CAMC-151FE0C/2021|EPI\_ISL\_1740781|2021-04-22  
hCoV-19/England/MILK-1517FA7/2021|EPI\_ISL\_1740858|2021-04-18  
hCoV-19/England/MILK-1517CBF/2021|EPI\_ISL\_1740882|2021-04-19  
hCoV-19/England/QEUA-150DFE0/2021|EPI\_ISL\_1741081|2021-04-15  
hCoV-19/England/QEUA-150E0A0/2021|EPI\_ISL\_1741129|2021-04-15  
hCoV-19/England/ALDP-151462D/2021|EPI\_ISL\_1741186|2021-04-15  
hCoV-19/England/QEUA-150DDD7/2021|EPI\_ISL\_1741259|2021-04-15  
hCoV-19/Scotland/QEUA-150AE04/2021|EPI\_ISL\_1741651|2021-04-16  
hCoV-19/Scotland/QEUA-150B665/2021|EPI\_ISL\_1741677|2021-04-14  
hCoV-19/Scotland/QEUA-15001AB/2021|EPI\_ISL\_1741838|2021-04-13  
hCoV-19/Belgium/UZA-UA-CV2115112682/2021|EPI\_ISL\_1745199|2021-04-21  
hCoV-19/Singapore/658/2021|EPI\_ISL\_1752677|2021-04-19  
hCoV-19/England/MILK-151C92C/2021|EPI\_ISL\_1758205|2021-04-06  
hCoV-19/England/MILK-151CC14/2021|EPI\_ISL\_1758283|2021-04-06  
hCoV-19/England/ALDP-151A706/2021|EPI\_ISL\_1758301|2021-04-19



hCoV-19/England/ALDP-151A618/2021|EPI\_ISL\_1758376|2021-04-18  
hCoV-19/England/CAMC-151AA2B/2021|EPI\_ISL\_1758509|2021-04-19  
hCoV-19/England/CAMC-151AAD0/2021|EPI\_ISL\_1758558|2021-04-17  
hCoV-19/England/CAMC-151AAA3/2021|EPI\_ISL\_1758645|2021-04-14  
hCoV-19/Scotland/QEUIH-151114D/2021|EPI\_ISL\_1758819|2021-04-17  
hCoV-19/Scotland/QEUIH-150DF1D/2021|EPI\_ISL\_1758829|2021-04-16  
hCoV-19/England/ALDP-1519C9F/2021|EPI\_ISL\_1758890|2021-04-19  
hCoV-19/England/MILK-1516ED8/2021|EPI\_ISL\_1758919|2021-04-19  
hCoV-19/England/RAND-1515DDC/2021|EPI\_ISL\_1758982|2021-04-16  
hCoV-19/England/ALDP-151B94B/2021|EPI\_ISL\_1759190|2021-04-18  
hCoV-19/England/MILK-151BA39/2021|EPI\_ISL\_1759218|2021-04-06  
hCoV-19/England/ALDP-151B92D/2021|EPI\_ISL\_1759274|2021-04-18  
hCoV-19/England/MILK-151C35B/2021|EPI\_ISL\_1759278|2021-04-19  
hCoV-19/England/MILK-151B486/2021|EPI\_ISL\_1759335|2021-04-19  
hCoV-19/England/MILK-151C5CE/2021|EPI\_ISL\_1759847|2021-04-19  
hCoV-19/USA/WA-UW-2021041375198/2021|EPI\_ISL\_1785682|2021-04-13  
hCoV-19/USA/WA-UW-2021041244547/2021|EPI\_ISL\_1789403|2021-04-12  
hCoV-19/USA/WA-UW-2021041231568/2021|EPI\_ISL\_1789408|2021-04-12  
hCoV-19/USA/WA-UW-2021041224321/2021|EPI\_ISL\_1789424|2021-04-12  
hCoV-19/USA/WA-UW-2021041275729/2021|EPI\_ISL\_1789426|2021-04-12  
hCoV-19/England/RAND-151EC4F/2021|EPI\_ISL\_1790323|2021-04-18  
hCoV-19/England/QEUIH-151CFDF/2021|EPI\_ISL\_1790373|2021-04-19  
hCoV-19/England/RAND-151ED2E/2021|EPI\_ISL\_1790415|2021-04-17  
hCoV-19/England/ALDP-1522EAC/2021|EPI\_ISL\_1790461|2021-04-19  
hCoV-19/England/MILK-1523843/2021|EPI\_ISL\_1790473|2021-04-20  
hCoV-19/England/MILK-1523A5C/2021|EPI\_ISL\_1790475|2021-04-16  
hCoV-19/England/MILK-1523CFC/2021|EPI\_ISL\_1790529|2021-04-20  
hCoV-19/England/ALDP-1522D45/2021|EPI\_ISL\_1790538|2021-04-19  
hCoV-19/England/ALDP-1522DCD/2021|EPI\_ISL\_1790547|2021-04-19  
hCoV-19/England/MILK-1523667/2021|EPI\_ISL\_1790590|2021-04-20  
hCoV-19/England/ALDP-1522CFD/2021|EPI\_ISL\_1790596|2021-04-19  
hCoV-19/England/MILK-1523193/2021|EPI\_ISL\_1790610|2021-04-20  
hCoV-19/England/MILK-15235B5/2021|EPI\_ISL\_1790613|2021-04-20  
hCoV-19/England/MILK-1523CCF/2021|EPI\_ISL\_1790679|2021-04-16  
hCoV-19/England/MILK-1526770/2021|EPI\_ISL\_1790728|2021-04-21  
hCoV-19/England/MILK-15244B7/2021|EPI\_ISL\_1790753|2021-04-19  
hCoV-19/England/MILK-152462A/2021|EPI\_ISL\_1790800|2021-04-19  
hCoV-19/England/MILK-15248BB/2021|EPI\_ISL\_1790817|2021-04-18  
hCoV-19/England/MILK-1524806/2021|EPI\_ISL\_1790848|2021-04-20  
hCoV-19/England/MILK-15268F5/2021|EPI\_ISL\_1790883|2021-04-19  
hCoV-19/England/MILK-15248CA/2021|EPI\_ISL\_1790888|2021-04-20  
hCoV-19/England/MILK-152444E/2021|EPI\_ISL\_1790893|2021-04-17  
hCoV-19/England/MILK-1524D16/2021|EPI\_ISL\_1790905|2021-04-21  
hCoV-19/England/MILK-1526901/2021|EPI\_ISL\_1790928|2021-04-21  
hCoV-19/England/MILK-1524781/2021|EPI\_ISL\_1790940|2021-04-17  
hCoV-19/England/ALDP-15253C8/2021|EPI\_ISL\_1790990|2021-04-20  
hCoV-19/England/MILK-15267AD/2021|EPI\_ISL\_1790998|2021-04-17  
hCoV-19/Switzerland/AG-UZH-IMV-3ba47ad1/2021|EPI\_ISL\_1791066|2021-04-24  
hCoV-19/Netherlands/NH-RIVM-27142/2021|EPI\_ISL\_1792906|2021-04-13  
hCoV-19/Netherlands/NB-RIVM-27390/2021|EPI\_ISL\_1792907|2021-04-15  
hCoV-19/USA/GA-CDC-STM-000052719/2021|EPI\_ISL\_1797026|2021-04-09  
hCoV-19/USA/TN-CDC-STM-000052160/2021|EPI\_ISL\_1797206|2021-04-08  
hCoV-19/USA/CA-CDC-LC0044861/2021|EPI\_ISL\_1799003|2021-04-12  
hCoV-19/USA/CA-CDC-LC0045319/2021|EPI\_ISL\_1799336|2021-04-11

hCoV-19/USA/NC-CDC-LC0047119/2021|EPI\_ISL\_1800981|2021-04-16  
hCoV-19/USA/IL-CDC-LC0049072/2021|EPI\_ISL\_1802476|2021-04-15  
hCoV-19/USA/IL-CDC-LC0049345/2021|EPI\_ISL\_1802644|2021-04-17  
hCoV-19/USA/IL-CDC-STM-000055027/2021|EPI\_ISL\_1803921|2021-04-13  
hCoV-19/USA/CA-CDC-STM-000055247/2021|EPI\_ISL\_1804135|2021-04-12  
hCoV-19/England/ALDP-15273A8/2021|EPI\_ISL\_1805965|2021-04-21  
hCoV-19/England/MILK-1528626/2021|EPI\_ISL\_1806406|2021-04-22  
hCoV-19/England/MILK-1528538/2021|EPI\_ISL\_1806433|2021-04-21  
hCoV-19/England/ALDP-152C437/2021|EPI\_ISL\_1806511|2021-04-22  
hCoV-19/England/ALDP-152CACC/2021|EPI\_ISL\_1806517|2021-04-22  
hCoV-19/England/ALDP-152BB42/2021|EPI\_ISL\_1806521|2021-04-21  
hCoV-19/England/ALDP-152CF27/2021|EPI\_ISL\_1806561|2021-04-22  
hCoV-19/England/MILK-152C798/2021|EPI\_ISL\_1806601|2021-04-21  
hCoV-19/England/ALDP-152BCA9/2021|EPI\_ISL\_1806670|2021-04-21  
hCoV-19/England/MILK-152C82C/2021|EPI\_ISL\_1806709|2021-04-22  
hCoV-19/England/MILK-152C65F/2021|EPI\_ISL\_1806761|2021-04-21  
hCoV-19/England/MILK-152C4FB/2021|EPI\_ISL\_1806767|2021-04-22  
hCoV-19/England/ALDP-152C40A/2021|EPI\_ISL\_1806837|2021-04-22  
hCoV-19/England/ALDP-152C042/2021|EPI\_ISL\_1806852|2021-04-22  
hCoV-19/Scotland/QEUAH-15227ED/2021|EPI\_ISL\_1806892|2021-04-20  
hCoV-19/Scotland/MILK-1524833/2021|EPI\_ISL\_1806897|2021-04-20  
hCoV-19/Scotland/MILK-152488E/2021|EPI\_ISL\_1806899|2021-04-20  
hCoV-19/NorthernIreland/RAND-151F710/2021|EPI\_ISL\_1806953|2021-04-20  
hCoV-19/Sweden/1067735009/2021|EPI\_ISL\_1808686|2021-04-01  
hCoV-19/Switzerland/GE-33896105/2021|EPI\_ISL\_1811202|2021-04-17  
hCoV-19/NewZealand/21MV0340/2021|EPI\_ISL\_1621314|2021-04-09  
hCoV-19/USA/WA-UW-2021040507831/2021|EPI\_ISL\_1628185|2021-04-05  
hCoV-19/England/MILK-14DDCD4/2021|EPI\_ISL\_1631923|2021-04-06  
hCoV-19/England/CAMC-14DEBF4/2021|EPI\_ISL\_1632316|2021-04-06  
hCoV-19/England/CAMC-14DECF1/2021|EPI\_ISL\_1632335|2021-04-06  
hCoV-19/England/CAMC-14DEBA9/2021|EPI\_ISL\_1632426|2021-04-06  
hCoV-19/England/QEUAH-14E884B/2021|EPI\_ISL\_1634973|2021-04-07  
hCoV-19/England/CAMC-14DEE28/2021|EPI\_ISL\_1635371|2021-04-07  
hCoV-19/Scotland/CAMC-14DEB6D/2021|EPI\_ISL\_1635379|2021-04-07  
hCoV-19/England/RAND-14FD46D/2021|EPI\_ISL\_1652717|2021-04-12  
hCoV-19/England/CAMC-15034AF/2021|EPI\_ISL\_1697491|2021-04-11  
hCoV-19/England/CAMC-1502956/2021|EPI\_ISL\_1697919|2021-04-11  
hCoV-19/England/MILK-150939D/2021|EPI\_ISL\_1698106|2021-04-15  
hCoV-19/England/MILK-15056B6/2021|EPI\_ISL\_1699676|2021-04-14  
hCoV-19/England/ALDP-14F4008/2021|EPI\_ISL\_1700038|2021-04-11  
hCoV-19/USA/WA-UW-2021041370801/2021|EPI\_ISL\_1715530|2021-04-13  
hCoV-19/Greece/180491/2021|EPI\_ISL\_1716736|2021-03-23  
hCoV-19/England/ALDP-1513961/2021|EPI\_ISL\_1718381|2021-04-16  
hCoV-19/England/ALDP-150F79B/2021|EPI\_ISL\_1718598|2021-04-15  
hCoV-19/England/RAND-1514D91/2021|EPI\_ISL\_1718700|2021-04-15  
hCoV-19/England/CAMC-15107C4/2021|EPI\_ISL\_1718942|2021-04-16  
hCoV-19/England/MILK-1512319/2021|EPI\_ISL\_1719212|2021-04-17  
hCoV-19/England/QEUAH-150C52B/2021|EPI\_ISL\_1719573|2021-04-17  
hCoV-19/England/PHWC-PYRYFW/2021|EPI\_ISL\_1730804|2021-04-15  
hCoV-19/England/ALDP-151FEA2/2021|EPI\_ISL\_1740707|2021-04-19  
hCoV-19/England/QEUAH-150E2E6/2021|EPI\_ISL\_1741213|2021-04-15  
hCoV-19/Scotland/QEUAH-1500A64/2021|EPI\_ISL\_1741909|2021-04-13  
hCoV-19/England/ALDP-1526A4A/2021|EPI\_ISL\_1790745|2021-04-20  
hCoV-19/England/MILK-152461B/2021|EPI\_ISL\_1790832|2021-04-17

|                  |                                                                                                                                                                                                                                                                                                                                                                                                                                                                                                                                                                                                                                                                                                                                                                                                                                                                                                                                                                                                                                                                                                                                                                                                                                                                                                                                                                                                                                                                                                                                                                                                                                                                                                                                                                                                                                                                                                                                                                                                                                                                                                                                                                                                                                                                                                                                                                                                                                                                                                                                                                                                                                                                                                                                                                                                                        |
|------------------|------------------------------------------------------------------------------------------------------------------------------------------------------------------------------------------------------------------------------------------------------------------------------------------------------------------------------------------------------------------------------------------------------------------------------------------------------------------------------------------------------------------------------------------------------------------------------------------------------------------------------------------------------------------------------------------------------------------------------------------------------------------------------------------------------------------------------------------------------------------------------------------------------------------------------------------------------------------------------------------------------------------------------------------------------------------------------------------------------------------------------------------------------------------------------------------------------------------------------------------------------------------------------------------------------------------------------------------------------------------------------------------------------------------------------------------------------------------------------------------------------------------------------------------------------------------------------------------------------------------------------------------------------------------------------------------------------------------------------------------------------------------------------------------------------------------------------------------------------------------------------------------------------------------------------------------------------------------------------------------------------------------------------------------------------------------------------------------------------------------------------------------------------------------------------------------------------------------------------------------------------------------------------------------------------------------------------------------------------------------------------------------------------------------------------------------------------------------------------------------------------------------------------------------------------------------------------------------------------------------------------------------------------------------------------------------------------------------------------------------------------------------------------------------------------------------------|
|                  | <p>hCoV-19/England/MILK-1524763/2021 EPI_ISL_1791005 2021-04-19<br/> hCoV-19/Aruba/AW-RIVM-27687/2021 EPI_ISL_1792922 2021-04-16<br/> hCoV-19/USA/NY-CDC-LC0046732/2021 EPI_ISL_1800829 2021-04-15<br/> hCoV-19/USA/MD-CDC-LC0047180/2021 EPI_ISL_1801017 2021-04-16<br/> hCoV-19/USA/NC-CDC-STM-000053861/2021 EPI_ISL_1804282 2021-04-11<br/> hCoV-19/England/QEUIH-1528DF4/2021 EPI_ISL_1806236 2021-04-21<br/> hCoV-19/England/MILK-152877E/2021 EPI_ISL_1806342 2021-04-22<br/> hCoV-19/England/QEUIH-1528D30/2021 EPI_ISL_1806353 2021-04-21<br/> hCoV-19/England/ALDP-152BE2B/2021 EPI_ISL_1806594 2021-04-21<br/> hCoV-19/England/ALDP-152BE0D/2021 EPI_ISL_1806695 2021-04-21<br/> hCoV-19/Scotland/MILK-152454B/2021 EPI_ISL_1806900 2021-04-18<br/> hCoV-19/Scotland/MILK-152496D/2021 EPI_ISL_1806901 2021-04-20<br/> hCoV-19/Scotland/MILK-15245B4/2021 EPI_ISL_1806902 2021-04-20<br/> hCoV-19/Scotland/MILK-15243BA/2021 EPI_ISL_1806903 2021-04-18</p>                                                                                                                                                                                                                                                                                                                                                                                                                                                                                                                                                                                                                                                                                                                                                                                                                                                                                                                                                                                                                                                                                                                                                                                                                                                                                                                                                                                                                                                                                                                                                                                                                                                                                                                                                                                                                                                 |
| <b>B.1.617.3</b> | <p>hCoV-19/India/MH-NCCS-86945/2021 EPI_ISL_1415164 2021-02-13<br/> hCoV-19/India/MH-NCCS-87388/2021 EPI_ISL_1415165 2021-02-16<br/> hCoV-19/India/MH-NCCS-87005/2021 EPI_ISL_1415181 2021-02-14<br/> hCoV-19/India/MH-NCCS-87272/2021 EPI_ISL_1415276 2021-02-16<br/> hCoV-19/India/MH-NCCS-87400/2021 EPI_ISL_1415277 2021-02-16<br/> hCoV-19/India/MH-NCCS-87017/2021 EPI_ISL_1415286 2021-02-14<br/> hCoV-19/India/MH-NCCS-87447/2021 EPI_ISL_1415317 2021-02-16<br/> hCoV-19/India/MH-NCCS-87273/2021 EPI_ISL_1415318 2021-02-16<br/> hCoV-19/India/MH-NCCS-87387/2021 EPI_ISL_1415319 2021-02-16<br/> hCoV-19/India/MH-NCCS-87434/2021 EPI_ISL_1415356 2021-02-16<br/> hCoV-19/India/MH-NCCS-87412/2021 EPI_ISL_1415357 2021-02-16<br/> hCoV-19/India/MH-NCCS-87026/2021 EPI_ISL_1415386 2021-02-14<br/> hCoV-19/England/CAMC-143E11E/2021 EPI_ISL_1454202 2021-03-22<br/> hCoV-19/India/ILSGS00782/2021 EPI_ISL_1663380 2021-03-02<br/> hCoV-19/India/ILSGS00810/2021 EPI_ISL_1663409 2021-03-06<br/> hCoV-19/India/ILSGS00820/2021 EPI_ISL_1663418 2021-03-08<br/> hCoV-19/India/ILSGS00919/2021 EPI_ISL_1663495 2021-04-02<br/> hCoV-19/India/ILSGS00975/2021 EPI_ISL_1663546 2021-03-13<br/> hCoV-19/USA/CA-Stanford-15_S42/2021 EPI_ISL_1701680 2021-03-27<br/> hCoV-19/India/MH-ICMR-NIV-INSACOG-GSEQ-193/2021 EPI_ISL_1704392 2021-02-16<br/> hCoV-19/India/MH-ICMR-NIV-INSACOG-GSEQ-267/2021 EPI_ISL_1704407 2021-02-16<br/> hCoV-19/India/MH-ICMR-NIV-INSACOG-GSEQ-467/2021 EPI_ISL_1704472 2021-03-02<br/> hCoV-19/India/MH-ICMR-NIV-INSACOG-GSEQ-471/2021 EPI_ISL_1704474 2021-03-02<br/> hCoV-19/India/MH-ICMR-NIV-INSACOG-GSEQ-733/2021 EPI_ISL_1704519 2021-03-03<br/> hCoV-19/India/MH-ICMR-NIV-INSACOG-GSEQ-757/2021 EPI_ISL_1704526 2021-03-03<br/> hCoV-19/India/MH-ICMR-NIV-INSACOG-GSEQ-764/2021 EPI_ISL_1704531 2021-03-15<br/> hCoV-19/India/MH-ICMR-NIV-INSACOG-GSEQ-773/2021 EPI_ISL_1704535 2021-03-05<br/> hCoV-19/India/MH-ICMR-NIV-INSACOG-GSEQ-1294/2021 EPI_ISL_1704623 2021-03-15<br/> hCoV-19/England/ALDP-15192D9/2021 EPI_ISL_1759112 2021-04-17<br/> hCoV-19/Russia/SPE-RII-32661S/2021 EPI_ISL_1797437 2021-04-21<br/> hCoV-19/England/ALDP-153351C/2021 EPI_ISL_1830471 2021-04-23<br/> hCoV-19/India/MH-NS1118/2021 EPI_ISL_1838050 2021-04-06<br/> hCoV-19/India/MH-NS1119/2021 EPI_ISL_1838052 2021-04-06<br/> hCoV-19/India/MH-NS1137/2021 EPI_ISL_1838097 2021-04-06<br/> hCoV-19/India/MH-NS1152/2021 EPI_ISL_1838131 2021-03-15<br/> hCoV-19/India/MH-NS1284/2021 EPI_ISL_1838345 2021-03-31<br/> hCoV-19/India/AP-CCMB-BJ434/2021 EPI_ISL_1838377 2021-03-13<br/> hCoV-19/India/AP-CCMB-BJ486/2021 EPI_ISL_1838380 2021-03-15<br/> hCoV-19/India/AP-CCMB-BL326/2021 EPI_ISL_1838545 2021-03-26<br/> hCoV-19/India/AP-CCMB-BL333/2021 EPI_ISL_1838552 2021-03-26</p> |

|                |                                                                                                                                                                                                                                                                                                                                                                                                                                                                                                                                                                                                                                                                                                                                                                                                                                                                                                                                                                                                                                                                                                                                                                                                                                                                                                                                                                                                                                                                                                                                                                                                                                                                                                                                                                                                                                                                                                                                                                                                                                                                                                                                                                                                                                                                                                                                                                                                                                                                                                                                                                                                                                                                                                                                                                                                                                                                                                                                                                                                                                                                                                                                                                    |
|----------------|--------------------------------------------------------------------------------------------------------------------------------------------------------------------------------------------------------------------------------------------------------------------------------------------------------------------------------------------------------------------------------------------------------------------------------------------------------------------------------------------------------------------------------------------------------------------------------------------------------------------------------------------------------------------------------------------------------------------------------------------------------------------------------------------------------------------------------------------------------------------------------------------------------------------------------------------------------------------------------------------------------------------------------------------------------------------------------------------------------------------------------------------------------------------------------------------------------------------------------------------------------------------------------------------------------------------------------------------------------------------------------------------------------------------------------------------------------------------------------------------------------------------------------------------------------------------------------------------------------------------------------------------------------------------------------------------------------------------------------------------------------------------------------------------------------------------------------------------------------------------------------------------------------------------------------------------------------------------------------------------------------------------------------------------------------------------------------------------------------------------------------------------------------------------------------------------------------------------------------------------------------------------------------------------------------------------------------------------------------------------------------------------------------------------------------------------------------------------------------------------------------------------------------------------------------------------------------------------------------------------------------------------------------------------------------------------------------------------------------------------------------------------------------------------------------------------------------------------------------------------------------------------------------------------------------------------------------------------------------------------------------------------------------------------------------------------------------------------------------------------------------------------------------------------|
|                | <p>hCoV-19/India/AP-CCMB-BN947/2021 EPI_ISL_1838655 2021-04-07<br/> hCoV-19/India/TG-CCMB-BJ886/2021 EPI_ISL_1838772 2021-03-18<br/> hCoV-19/India/MH-ICMR-NIV-INSAGOG-GSEQ-1377/2021 EPI_ISL_1928408 2021-03-06<br/> hCoV-19/India/MH-ICMR-NIV-INSAGOG-GSEQ-1376/2021 EPI_ISL_1928411 2021-03-07<br/> hCoV-19/India/MH-ICMR-NIV-INSAGOG-GSEQ-1246/2021 EPI_ISL_1928430 2021-03-14<br/> hCoV-19/India/MH-ICMR-NIV-INSAGOG-GSEQ-1245/2021 EPI_ISL_1928432 2021-03-14<br/> hCoV-19/India/MH-ICMR-NIV-INSAGOG-GSEQ-2167/2021 EPI_ISL_1928459 2021-03-23<br/> hCoV-19/India/GJ-ICMR-NIV-INSACOG-GSEQ-2821/2021 EPI_ISL_1928510 2021-04-07<br/> hCoV-19/India/MH-SEQ-221_S66_R1_001/2021 EPI_ISL_1939891 2021-03-22</p>                                                                                                                                                                                                                                                                                                                                                                                                                                                                                                                                                                                                                                                                                                                                                                                                                                                                                                                                                                                                                                                                                                                                                                                                                                                                                                                                                                                                                                                                                                                                                                                                                                                                                                                                                                                                                                                                                                                                                                                                                                                                                                                                                                                                                                                                                                                                                                                                                                                 |
| <b>B.1.618</b> | <p>hCoV-19/Turkey/HSGM-3219/2021 EPI_ISL_1117626 2021-01-28<br/> hCoV-19/Singapore/275/2021 EPI_ISL_1312386 2021-03-17<br/> hCoV-19/India/MH-1931500863416/2021 EPI_ISL_1419052 2021-02-19<br/> hCoV-19/India/WB-1931300231694/2021 EPI_ISL_1419147 2021-02-17<br/> hCoV-19/India/WB-1931200139612/2021 EPI_ISL_1419195 2021-02-04<br/> hCoV-19/India/WB-1931300223894/2021 EPI_ISL_1419250 2021-02-02<br/> hCoV-19/India/WB-1931300234499/2021 EPI_ISL_1419354 2021-02-22<br/> hCoV-19/India/WB-1931300236872/2021 EPI_ISL_1419391 2020-10-26<br/> hCoV-19/India/WB-1931300237620/2021 EPI_ISL_1419396 2020-10-27<br/> hCoV-19/India/WB-1930300527247/2021 EPI_ISL_1419410 2021-02-22<br/> hCoV-19/India/WB-1931300241740/2021 EPI_ISL_1419413 2021-03-07<br/> hCoV-19/India/WB-1931300244017/2021 EPI_ISL_1419416 2021-03-12<br/> hCoV-19/India/WB-1931500765852/2021 EPI_ISL_1419444 2021-01-21<br/> hCoV-19/India/WB-1930400315726/2021 EPI_ISL_1419482 2021-01-28<br/> hCoV-19/India/WB-1932000223806/2021 EPI_ISL_1419485 2021-02-16<br/> hCoV-19/India/WB-1931500877129/2021 EPI_ISL_1419511 2021-02-23<br/> hCoV-19/India/WB-1931500868167/2021 EPI_ISL_1419550 2021-02-20<br/> hCoV-19/India/WB-1931500868122/2021 EPI_ISL_1419551 2021-02-20<br/> hCoV-19/India/WB-1931500869429/2021 EPI_ISL_1419555 2021-02-20<br/> hCoV-19/India/WB-1931500869442/2021 EPI_ISL_1419556 2021-02-20<br/> hCoV-19/India/WB-1931500871419/2021 EPI_ISL_1419557 2021-02-21<br/> hCoV-19/India/WB-1931500872957/2021 EPI_ISL_1419561 2021-02-22<br/> hCoV-19/India/WB-1931500874921/2021 EPI_ISL_1419564 2021-02-22<br/> hCoV-19/India/WB-1931500877555/2021 EPI_ISL_1419569 2021-02-23<br/> hCoV-19/India/WB-1931500882376/2021 EPI_ISL_1419571 2021-02-23<br/> hCoV-19/India/WB-1931500882322/2021 EPI_ISL_1419573 2021-02-24<br/> hCoV-19/India/WB-1931500882398/2021 EPI_ISL_1419575 2021-02-24<br/> hCoV-19/India/WB-1931500877383/2021 EPI_ISL_1419577 2021-02-24<br/> hCoV-19/India/WB-1931500893199/2021 EPI_ISL_1419607 2021-02-27<br/> hCoV-19/India/WB-1931500898749/2021 EPI_ISL_1419615 2021-03-01<br/> hCoV-19/India/WB-1931500899362/2021 EPI_ISL_1419617 2021-03-01<br/> hCoV-19/India/WB-1931500914459/2021 EPI_ISL_1419640 2021-03-05<br/> hCoV-19/India/WB-1931500916033/2021 EPI_ISL_1419641 2021-03-05<br/> hCoV-19/India/WB-1931500913500/2021 EPI_ISL_1419647 2021-03-04<br/> hCoV-19/India/WB-1930300536764/2021 EPI_ISL_1419688 2021-02-26<br/> hCoV-19/India/WB-1930300449497/2021 EPI_ISL_1419695 2021-01-14<br/> hCoV-19/India/WB-1930300451753/2021 EPI_ISL_1419696 2021-01-15<br/> hCoV-19/India/WB-1931500802025/2021 EPI_ISL_1419738 2021-02-01<br/> hCoV-19/India/WB-1930300524189/2021 EPI_ISL_1419769 2021-02-20<br/> hCoV-19/India/WB-194234878/2021 EPI_ISL_1419775 2021-02-13<br/> hCoV-19/India/WB-1970400161836/2021 EPI_ISL_1419791 2021-02-20<br/> hCoV-19/India/WB-1930600197769/2021 EPI_ISL_1419853 2021-02-17<br/> hCoV-19/India/WB-1931800119269/2021 EPI_ISL_1419893 2021-03-02<br/> hCoV-19/India/WB-1931800119273/2021 EPI_ISL_1419894 2021-03-02<br/> hCoV-19/India/WB-1931500920028/2021 EPI_ISL_1419921 2021-03-06</p> |

|                                                                 |
|-----------------------------------------------------------------|
| hCoV-19/Canada/ON-PHL-21-08963/2021 EPI_ISL_1559143 2021-03     |
| hCoV-19/India/WB-1930300561111/2021 EPI_ISL_1589787 2021-03-09  |
| hCoV-19/India/WB-1931300248145/2021 EPI_ISL_1589795 2021-03-20  |
| hCoV-19/India/WB-1931500902089/2021 EPI_ISL_1589796 2021-03-02  |
| hCoV-19/India/WB-1931300246768/2021 EPI_ISL_1589797 2021-03-17  |
| hCoV-19/India/WB-1930400358832/2021 EPI_ISL_1589798 2021-02-21  |
| hCoV-19/India/WB-1930400370165/2021 EPI_ISL_1589799 2021-02-24  |
| hCoV-19/India/WB-1931500994932/2021 EPI_ISL_1589800 2021-03-25  |
| hCoV-19/India/WB-1930300547970/2021 EPI_ISL_1589801 2021-03-03  |
| hCoV-19/India/WB-1930300547898/2021 EPI_ISL_1589802 2021-03-03  |
| hCoV-19/India/WB-1930300561592/2021 EPI_ISL_1589803 2021-03-09  |
| hCoV-19/India/WB-1930300565789/2021 EPI_ISL_1589804 2021-03-11  |
| hCoV-19/India/WB-1930300557101/2021 EPI_ISL_1589805 2021-03-07  |
| hCoV-19/India/WB-1930300558684/2021 EPI_ISL_1589806 2021-03-08  |
| hCoV-19/India/WB-1930300585540/2021 EPI_ISL_1589807 2021-03-19  |
| hCoV-19/India/WB-1931500985650/2021 EPI_ISL_1589808 2021-03-23  |
| hCoV-19/India/WB-1931700212203/2021 EPI_ISL_1589810 2021-03-04  |
| hCoV-19/India/WB-1931700215417/2021 EPI_ISL_1589811 2021-03-11  |
| hCoV-19/India/WB-1930400386726/2021 EPI_ISL_1589812 2021-03-09  |
| hCoV-19/India/WB-1930400392771/2021 EPI_ISL_1589813 2021-03-12  |
| hCoV-19/India/WB-1930400390662/2021 EPI_ISL_1589814 2021-03-11  |
| hCoV-19/India/WB-1930400402838/2021 EPI_ISL_1589815 2021-03-19  |
| hCoV-19/India/WB-1931500908129/2021 EPI_ISL_1589816 2021-03-03  |
| hCoV-19/Germany/un-RKI-I-077252/2021 EPI_ISL_1642908 2021-04-07 |
| hCoV-19/India/CT-ILSGS00421/2021 EPI_ISL_1662359 2021-02-09     |
| hCoV-19/India/CT-ILSGS00422/2021 EPI_ISL_1662360 2021-02-09     |
